# Supplementary material for: pH and redox dual-sensitive drug delivery system constructed based on fluorescent carbon dots
Source: Royal Society of Chemistry journal article supplement (doi:10.1039/d0ra09164b), 2021-01-01
Supplement: d0ra09164b1.pdf [file d0ra09164b1.pdf]

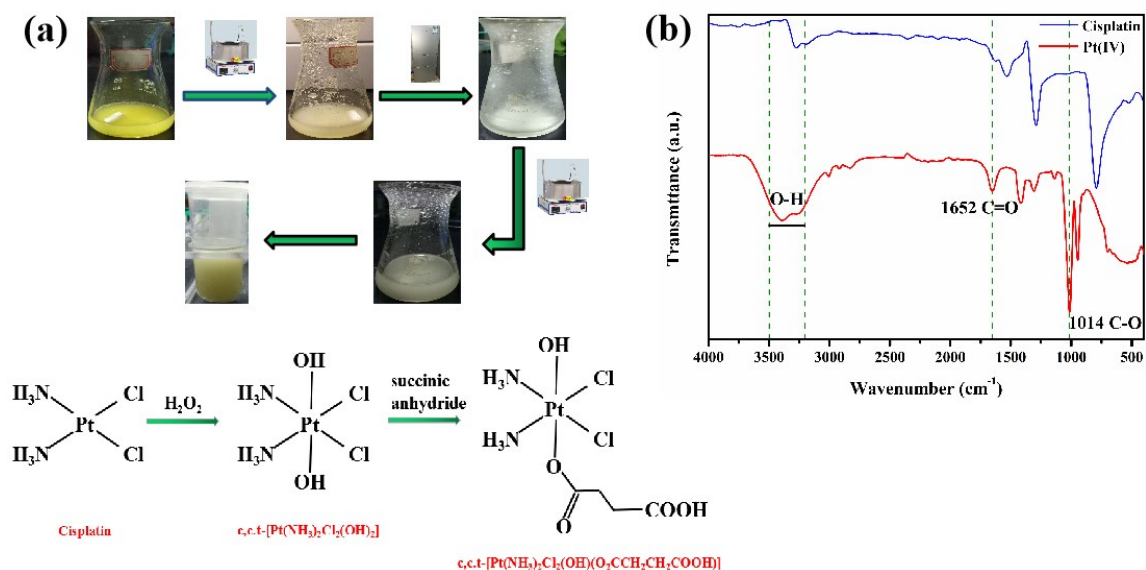

**Fig. S1** (a) The process for the preparation of cisplatin(IV) prodrug (Pt(IV)). (b) FTIR spectra of cisplatin and Pt(IV).

As shown in Fig. S1a, Pt(IV) was prepared as follows: Two axial hydroxyl groups were added to cisplatin with hydrogen peroxide.  $(c,c,t-[Pt(NH_3)_2Cl_2(OH)_2])$  as the intermediate product was produced. The intermediate product was then further functionalized with carboxylic acid groups by reacting with succinic anhydride for getting the final product Pt(IV)  $(c,c,t-[Pt(NH_3)_2Cl_2(OH)(O_2CCH_2CH_2COOH)])$ .

As depicted in Fig. S1b, the broad absorption peak at 3200-3500  $cm^{-1}$  was assigned to the stretching vibration of O-H bond. The absorption peak at 1652  $cm^{-1}$  corresponded to the stretching vibration of C=O bond of carboxyl group. The sharp peak at 1014  $cm^{-1}$  was attributed to the C-O bond of the carboxyl group. The FTIR analysis showed that the preparation of Pt(IV) was rich in carboxyl groups.

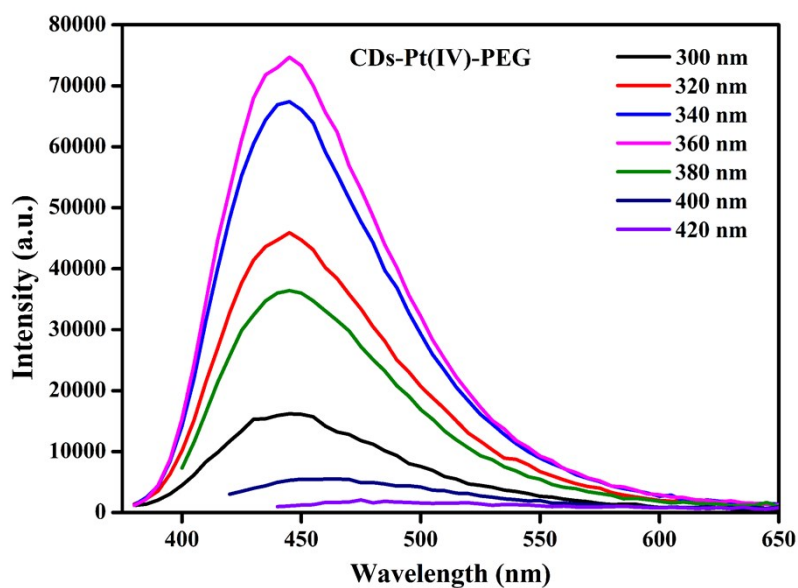

**Fig. S2** Fluorescence spectra of CDs-Pt(IV)-PEG under different excitation wavelengths.

As shown in Fig. S2, fluorescence spectra of CDs-Pt(IV)-PEG under different excitation wavelengths showed that the maximum emission intensity was obtained under 360 nm excitation. The fluorescent emission peak of CDs-Pt(IV)-PEG presented redshift from 445 to 475 nm with increase the excitation wavelength. Compared with the fluorescence spectra of CDs, there were some changes in the emission peaks of CDs-Pt(IV)-PEG owing to the functionalization of CDs with the various surface states of cisplatin(IV) and mPEG-CHO.

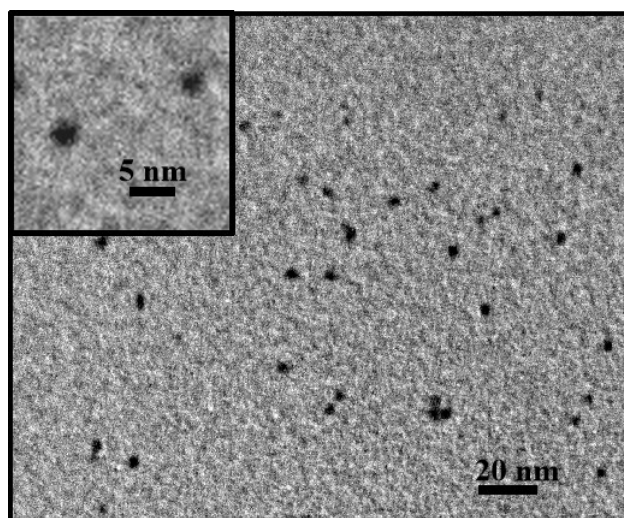

**Fig. S3** TEM image of CDs, insert is the magnified TEM image.

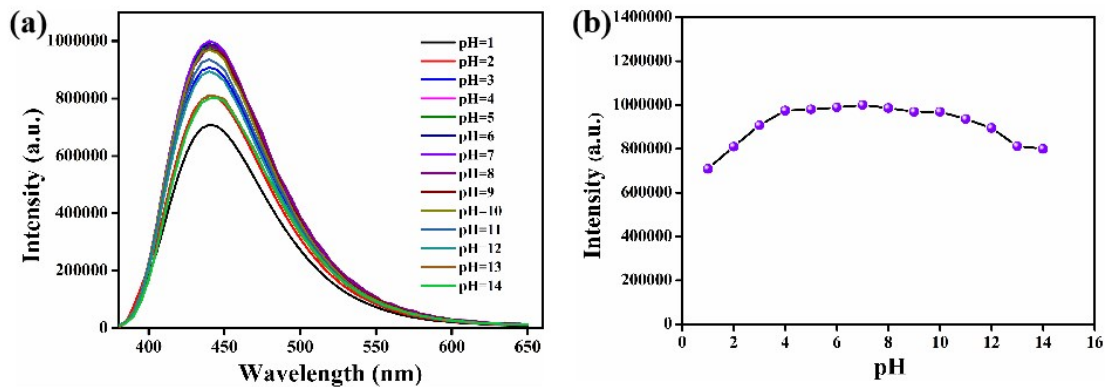

**Fig. S4** (a) Fluorescence spectra of CDs versus pH values under excitation at 360 nm. (b) Fluorescence intensity of CDs versus pH values.

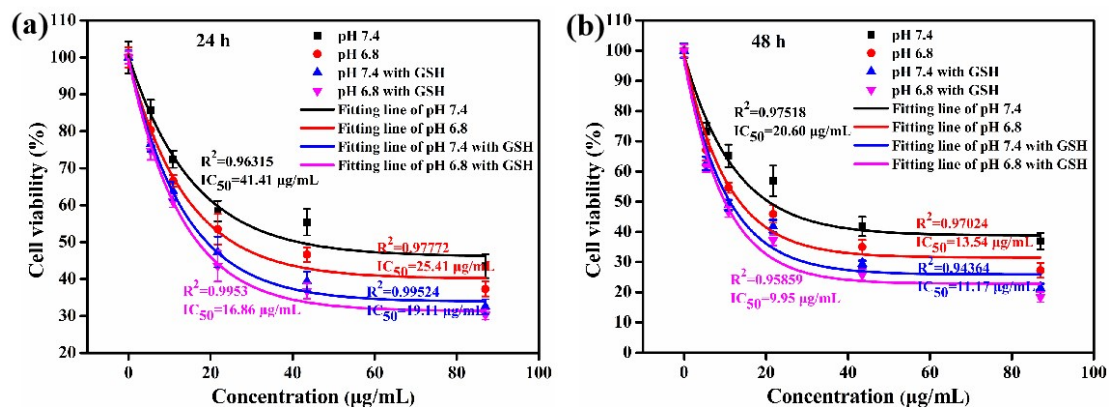

**Fig. S5** Fitting curve of cell viability of MGC-803 cells after co-incubation of CDs–Pt(IV)-PEG for (a) 24 h and (b) 48 h at pH 7.4 or pH 6.8 with or without GSH.

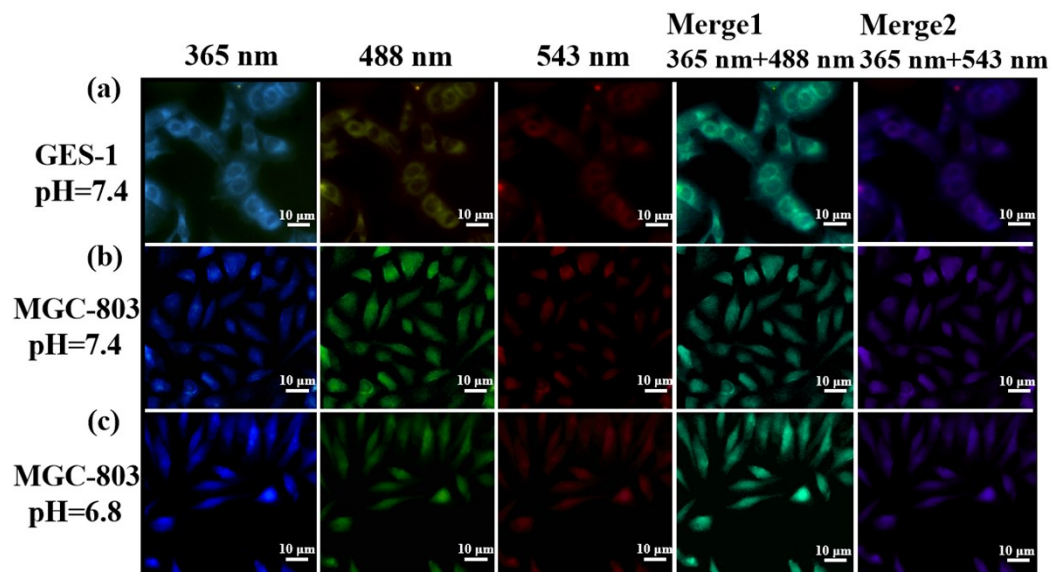

**Fig. S6** The fluorescence microscopy images under different excitation wavelengths (365, 488, and 543 nm) and the corresponding merged images. The cells were incubated with CDs-Pt(IV)-PEG for 6 h at different pH values. (a) GES-1 cells at pH 7.4, (b) MGC-803 cells at pH 7.4, and (c) MGC-803 cells at pH 6.8.

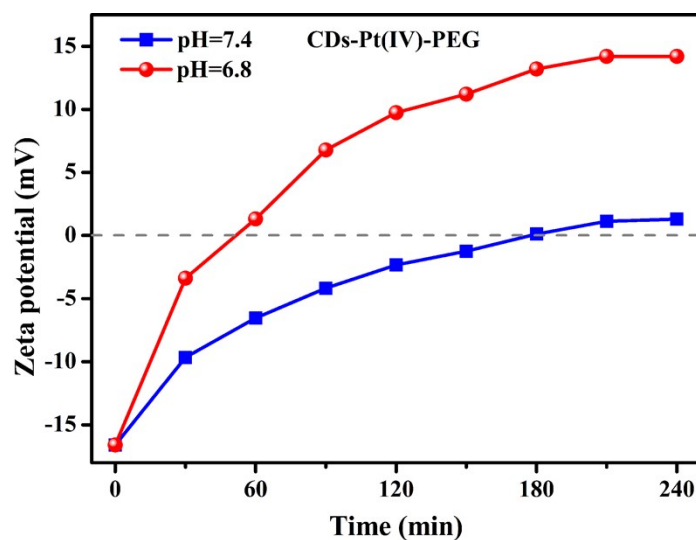

**Fig. S7** Zeta potential of CDs-Pt(IV)-PEG in a PBS buffer solution (pH=7.4 or 6.8) for incubation at 37 °C for 4 h.
